# Supplementary material
Source: ML conference proceedings conference paper supplement (https://openaccess.thecvf.com/content/ICCV2021/html/Razani_GP-S3Net_Graph-Based_Panoptic_ICCV_2021_paper.html)
Supplement: Supplementary file 2 [file Razani_GP-S3Net_Graph-Based_Panoptic_ICCV_2021_supplemental.zip]

Archive with 2 entries (2 files):
- 09364_sup_2.mp4
- 09364_sup_1.pdf
